# Supplementary material for: Statins and All‐Cause Mortality in Patients Undergoing Hemodialysis
Source: PubMed Central journal article supplement — J Am Heart Assoc. 2020 Feb 22;9(5):e014840. doi: 10.1161/JAHA.119.014840 (PMC7335561; doi:10.1161/jaha.119.014840), 2020-02-22
Supplement: JAH3-9-e014840-s001.pdf [file JAH3-9-e014840-s001.pdf]

# **SUPPLEMENTAL MATERIAL**

**Table S1. Variables in the Korean National Health Insurance claim data.**

| <b>Category</b>                | <b>Variables</b>                                                                                                                                      |
|--------------------------------|-------------------------------------------------------------------------------------------------------------------------------------------------------|
| <b>Demographic information</b> | Sex, Age, Region, Death, Type of Qualification                                                                                                        |
| <b>Diagnosis</b>               | Principal diagnosis, 9 additional diagnosis (ICD-10)                                                                                                  |
| <b>Healthcare utilization</b>  | Health and medical care institution, Payment, Day of medical care, Number of visiting day, In-hospital administration of medicine, Procedure, Surgery |
| <b>Prescription</b>            | Name of Drug, Date, Filled days, Quantity dispensed                                                                                                   |

ICD-10, International Classification of Diseases 10th Revision.

**Table S2. Classification of statin therapy intensity and prescriptions captured in the present study.**

| <b>Statin therapy</b>                                              | <b>Statins</b>                                                                                                                                                                                  |
|--------------------------------------------------------------------|-------------------------------------------------------------------------------------------------------------------------------------------------------------------------------------------------|
| <b>The Intensity of statin therapy<sup>1</sup></b>                 |                                                                                                                                                                                                 |
| High-Intensity Statin Therapy                                      | Atorvastatin (40)-80mg<br>Rosuvastatin 20 (40) mg                                                                                                                                               |
| Moderate-Intensity Statin Therapy                                  | Atorvastatin 10 (20) mg<br>Rosuvastatin (5) 10 mg<br>Simvastatin 20-40 mg<br>Pravastatin 40 (80) mg<br>Lovastatin 40 mg<br>Fluvastatin XL 80 mg<br>Fluvastatin 40 mg bid<br>Pitavastatin 2-4 mg |
| Low-Intensity Statin Therapy                                       | Simvastatin 10 mg<br>Pravastatin 10-20 mg<br>Lovastatin 20 mg<br>Fluvastatin XL 80 mg<br>Fluvastatin 20-40 mg<br>Pitavastatin 1 mg                                                              |
| <b>Statin prescriptions captured in the present study</b>          | Atorvastatin 5-80 mg<br>Rosuvastatin 5-20 mg<br>Simvastatin 5-40 mg<br>Pravastatin 5-40 mg<br>Lovastatin 20 mg<br>Fluvastatin 20-80 mg<br>Pitavastatin 1-4 mg                                   |
| <b>Statin-ezetimibe combinations captured in the present study</b> | Atorvastatin 10-40 mg/Ezetimibe 10mg<br>Rosuvastatin 5-20 mg/ Ezetimibe 10mg<br>Simvastatin 5-40 mg/Ezetimibe 10mg                                                                              |

**Table S3. International Classification of Diseases 10th Revision (ICD-10) codes for major comorbid diseases.**

| <b>Diseases</b>               | <b>ICD-10 codes</b> |
|-------------------------------|---------------------|
| <b>Hypertension</b>           | I10 ~ I15           |
| <b>Diabetes mellitus</b>      | E10 ~ E14           |
| <b>Coronary Heart Disease</b> | I20 ~ I25           |

**Table S4. International Classification of Diseases 10th Revision (ICD-10) mapping for Charlson Comorbidity Index.<sup>2</sup>**

| <b>Diseases</b>                            | <b>ICD-10 codes</b>                                                                                      | <b>Weight</b> |
|--------------------------------------------|----------------------------------------------------------------------------------------------------------|---------------|
| Myocardial infarction                      | I21, I22, I252                                                                                           | 1             |
| Congestive heart failure                   | I43, I50, I099, I110, I130, I132, I255, I420, I425, I426, I427, I428, I429, P290                         | 1             |
| Peripheral vascular disease                | I70, I71, I731, I738, I739, I771, I790, I792, K551, K558, K559, Z958, Z959                               | 1             |
| Cerebrovascular disease                    | G45, G46, I60 ~ I69, H340                                                                                | 1             |
| Dementia                                   | F00 ~ F03, G30, F051, G311                                                                               | 1             |
| Chronic Obstructive Pulmonary Disease      | J40 ~ J47, J60 ~ J67, I278, I279, J684, J701, J703                                                       | 1             |
| Connective Tissue Disease                  | M05, M32 ~ M34, M06, M315, M351, M353, M360                                                              | 1             |
| Peptic Ulcer Disease                       | K25 ~ K28                                                                                                | 1             |
| Mild Liver Disease                         | B18, K73, K74, K700, K701 ~ K703, K709, K717, K713, K714, K715, K760, K762 ~ K764, K768, K769, Z944      | 1             |
| Diabetes without complications             | E100, E101, E106, E108 ~ E111, E116, E118 ~ E121, E126, E128 ~ E131, E136, E138 ~ E141, E146, E148, E149 | 1             |
| Diabetes with complications                | E102 ~ E105, E107, E112 ~ E115, E117, E122 ~ E125, E127, E132 ~ E135, E137, E142 ~ E145, E147            | 2             |
| Paraplegia and Hemiplegia                  | G81, G82, G041, G114, G801, G802, G830 ~ G834, G839                                                      | 2             |
| Renal Disease                              | N18, N19, N052 ~ N057, N250, I120, I131, N032 ~ N037, Z490, Z491, Z492, Z940, Z992                       | 2             |
| Cancer                                     | C00 ~ C26, C30 ~ C34, C37 ~ C41, C43, C45 ~ C58, C60 ~ C76, C81 ~ C85, C88, C90 ~ C97                    | 2             |
| Moderate or Severe Liver Disease           | K704, K711, K721, K729, K765, K766, K767, I850, I859, I864, I982                                         | 3             |
| Metastatic Carcinoma                       | C77 ~ C80                                                                                                | 6             |
| Acquired immune deficiency syndrome (AIDS) | B20 ~ B22, B24                                                                                           | 6             |

**Table S5. Characteristics of study subjects based on statin ever-use and non-use.\***

| <b>Parameters</b>                     | <b>Groups/<br/>Subgroups</b> | <b>Non-users<br/>(N=17,502)</b> | <b>Ever-users<br/>(N=47,902)</b> |
|---------------------------------------|------------------------------|---------------------------------|----------------------------------|
| <b>Age at entry, Means (SD), year</b> | Total                        | 65.6 (14.1)                     | 64.67 (12.5)                     |
| <b>Subgroups by age, N (%)</b>        | 30~39                        | 855 (4.9)                       | 1,571 (3.3)                      |
|                                       | 40~49                        | 1,865 (10.7)                    | 4,631 (9.7)                      |
|                                       | 50~59                        | 2,912(16.6)                     | 9,617 (20.1)                     |
|                                       | 60~69                        | 3,777 (21.6)                    | 12,745 (26.6)                    |
|                                       | 70~                          | 8,093 (46.2)                    | 19,338 (40.4)                    |
| <b>Sex, N (%)</b>                     | Male                         | 11,136 (63.6)                   | 27,310 (57.0)                    |
|                                       | Female                       | 6,366 (36.4)                    | 20,592 (43.0)                    |
| <b>Hypertension, N (%)</b>            | Yes                          | 15,698 (89.7)                   | 46,932 (98.0)                    |
|                                       | No                           | 1,804 (10.3)                    | 970 (2.0)                        |
| <b>Diabetes Mellitus, N (%)</b>       | Yes                          | 10,732(61.3)                    | 40,296 (84.1)                    |
|                                       | No                           | 6,770 (38.7)                    | 7,606 (15.9)                     |
| <b>CHD, N (%)</b>                     | Yes                          | 4,895 (28.0)                    | 26,377 (55.1)                    |
|                                       | No                           | 12,607 (72.0)                   | 21,525 (44.9)                    |
| <b>CCI, Means (SD)</b>                | Total                        | 2.68 (1.9)                      | 3.53 (1.9)                       |
| <b>Groups by CCI, N (%)</b>           | CCI < 3                      | 9,082 (51.9)                    | 15,757 (32.9)                    |
|                                       | CCI ≥ 3                      | 8,420 (48.1)                    | 32,145 (67.1)                    |

\*Statin ever-use or non-use was evaluated in the included patients on hemodialysis during the study period from January 1, 2007, to December 31, 2017, whenever they started statins.

Note that all variables showed statistically significant differences at a p-value of 1%.

SD, standard deviation; CHD, coronary heart disease; CCI, Charlson Comorbidity Index.

**Table S6. Baseline characteristics at entry based on statin use.**

| Parameters                            | Variables | Non-users<br>(N=17,502) | Continuous users<br>(N=29,127) | Post-ESRD only users<br>(N=7,282) | Pre-ESRD only users<br>(N=11,493) |
|---------------------------------------|-----------|-------------------------|--------------------------------|-----------------------------------|-----------------------------------|
| <b>Age at entry, Means (SD), year</b> | Total     | 65.61 (14.1)            | 64.21(12.0)                    | 62.79 (13.1)                      | 67.01 (12.9)                      |
| <b>Subgroups by age, N (%)</b>        | 30~39     | 855 (4.9)               | 838 (2.9)                      | 397 (5.5)                         | 336 (2.9)                         |
|                                       | 40~49     | 1,865 (10.7)            | 2,793 (9.6)                    | 886 (12.2)                        | 952 (8.3)                         |
|                                       | 50~59     | 2,912 (16.6)            | 6,209 (21.3)                   | 1,537 (21.1)                      | 1,871 (16.3)                      |
|                                       | 60~69     | 3,777 (21.6)            | 8,286 (28.5)                   | 1,847 (25.4)                      | 2,612 (22.7)                      |
|                                       | 70~       | 8,093 (46.2)            | 11,001 (37.8)                  | 2,615 (35.9)                      | 5,722 (49.8)                      |
| <b>Sex, N (%)</b>                     | Male      | 11,136 (63.6)           | 16,318 (56.0)                  | 4,392 (60.3)                      | 6,600 (57.4)                      |
|                                       | Female    | 6,366 (36.3)            | 12,809 (44.0)                  | 2,890 (39.7)                      | 4,893 (42.6)                      |
| <b>Hypertension, N (%)</b>            | Yes       | 15,698 (89.7)           | 28,743 (98.7)                  | 6,990 (96.0)                      | 11,199 (97.4)                     |
|                                       | No        | 1,804 (10.3)            | 384 (1.3)                      | 292 (4.0)                         | 294 (2.6)                         |
| <b>Diabetes Mellitus, N (%)</b>       | Yes       | 10,732 (61.3)           | 25,566 (87.8)                  | 5,377 (73.8)                      | 9,353 (91.4)                      |
|                                       | No        | 6,770 (38.7)            | 3,561 (12.2)                   | 1,905 (26.2)                      | 2,140 (18.6)                      |
| <b>CHD, N (%)</b>                     | Yes       | 4,895 (28.0)            | 17,684 (60.7)                  | 3,684 (50.6)                      | 5,009 (43.6)                      |
|                                       | No        | 12,607 (72.0)           | 11,443 (39.3)                  | 3,598 (49.4)                      | 6,484 (56.4)                      |
| <b>CCI, Means (SD)</b>                | Total     | 2.68 (1.9)              | 3.77 (1.8)                     | 2.60 (1.9)                        | 3.53 (1.9)                        |
| <b>CCI category, N (%)</b>            | CCI < 3   | 9,082 (51.9)            | 8,017 (27.5)                   | 3,932 (54.0)                      | 3,808 (33.1)                      |
|                                       | CCI ≥ 3   | 8,420 (48.1)            | 21,110 (72.5)                  | 3,350 (46.0)                      | 7,685 (66.9)                      |

ESRD, end-stage renal disease; SD, standard deviation; CHD, coronary heart disease; CCI, Charlson Comorbidity Index.

Note that all variables showed statistically significant differences at a p-value of 1%.

**Table S7. Characteristics of study subjects according to the intensity of statin therapy after entry.**

| Parameters                           | Groups/<br>Subgroups | Non-users<br>(N=17,502) | Variable-intensity<br>(N=13,592) | High-intensity<br>(N=405) | Moderate-intensity<br>(N=21,928) | Low-or-less-<br>intensity<br>(N=484) |
|--------------------------------------|----------------------|-------------------------|----------------------------------|---------------------------|----------------------------------|--------------------------------------|
| <b>Age at entry, mean (SD), year</b> | Total                | 65.61 (14.1)            | 63.81 (11.7)                     | 64.84 (12.7)              | 63.99 (12.5)                     | 63.4 (13.5)                          |
| <b>Subgroups by age, N (%)</b>       | 30~39                | 855 (4.9)               | 387 (2.9)                        | 11 (2.7)                  | 807 (3.7)                        | 30 (6.2)                             |
|                                      | 40~49                | 1,865 (10.7)            | 1,294 (9.5)                      | 51 (12.6)                 | 2,279 (10.4)                     | 55 (11.4)                            |
|                                      | 50~59                | 2,912 (16.6)            | 3,023 (22.2)                     | 67 (16.5)                 | 4,563 (20.8)                     | 93 (19.2)                            |
|                                      | 60~69                | 3,777 (21.6)            | 4,010 (29.5)                     | 99 (24.4)                 | 5,909 (26.9)                     | 115 (23.8)                           |
|                                      | 70~                  | 8,093 (46.2)            | 4,878 (35.9)                     | 177 (43.7)                | 8,370 (38.2)                     | 191 (39.5)                           |
| <b>Sex, N (%)</b>                    | Male                 | 11,136 (63.6)           | 7,652 (56.3)                     | 269 (66.4)                | 12,499 (57.0)                    | 290 (66.2)                           |
|                                      | Female               | 6,366 (36.4)            | 5,940 (43.7)                     | 136 (33.6)                | 9,429 (43.0)                     | 194 (33.6)                           |
| <b>Hypertension, N (%)</b>           | Yes                  | 15,698 (89.7)           | 13,445 (98.9)                    | 384 (94.8)                | 21,447 (97.8)                    | 457 (94.4)                           |
|                                      | No                   | 1,804 (10.3)            | 147 (1.1)                        | 21 (5.2)                  | 481 (2.2)                        | 27 (5.6)                             |
| <b>Diabetes Mellitus, N (%)</b>      | Yes                  | 10,732 (61.3)           | 12,034 (88.5)                    | 310 (76.5)                | 18,259 (83.3)                    | 340 (70.3)                           |
|                                      | No                   | 6,770 (38.7)            | 1,558 (11.5)                     | 95 (23.5)                 | 3,669 (16.73)                    | 144 (29.8)                           |
| <b>CHD, N (%)</b>                    | Yes                  | 4,895 (27.97)           | 8,904 (65.5)                     | 237 (58.5)                | 12,021 (54.8)                    | 206 (42.6)                           |
|                                      | No                   | 12,607 (72.0)           | 4,688 (34.5)                     | 168 (41.5)                | 9,907 (45.2)                     | 278 (57.4)                           |
| <b>CCI, mean (SD)</b>                | Total                | 2.68 (1.9)              | 3.76(1.9)                        | 2.82 (1.8)                | 3.43(1.9)                        | 3.02(1.9)                            |
| <b>Group by CCI, N (%)</b>           | CCI < 3              | 9,082 (51.9)            | 3,850 (28.3)                     | 193 (47.7)                | 7,685 (35.1)                     | 221 (45.7)                           |
|                                      | CCI ≥ 3              | 8,420 (48.1)            | 9,742 (71.7)                     | 212(52.4)                 | 14,243 (65.0)                    | 263 (54.3)                           |

SD, standard deviation; CHD, coronary heart disease; CCI, Charlson Comorbidity Index.

Note that all variables showed statistically significant differences at a p-value of 1%.



**Table S8. Characteristics of patients based on the statin use period after entry: proportion of days covered (PDC) after entry.\***

| Parameters                               | Groups/<br>Subgroups | Non-users<br>(N=17,502) | Pre-ESRD only users<br>(N=11,493) | PDC after entry*   |                           |                           |                    |
|------------------------------------------|----------------------|-------------------------|-----------------------------------|--------------------|---------------------------|---------------------------|--------------------|
|                                          |                      |                         |                                   | <25%<br>(N=12,447) | ≥25 to < 50%<br>(N=5,152) | ≥50 to < 75%<br>(N=4,465) | ≥75%<br>(N=14,345) |
| <b>Age at entry, mean (SD),<br/>year</b> | total                | 65.61(14.1)             | 67.03(12.9)                       | 62.96(12.9)        | 63.76(12.5)               | 64.16 (12.0)              | 64.75 (11.5)       |
| <b>Subgroups by age, N (%)</b>           | 30~39                | 855 (4.9)               | 336 (2.9)                         | 549 (4.4)          | 188 (3.7)                 | 153 (3.4)                 | 345 (2.4)          |
|                                          | 40~49                | 1,865 (10.7)            | 962 (8.3)                         | 1,575 (12.7)       | 532 (10.3)                | 424 (9.5)                 | 1,148 (8.0)        |
|                                          | 50~59                | 2,912 (16.6)            | 1,871 (16.3)                      | 2,712 (21.8)       | 1,142 (22.2)              | 895 (20.0)                | 2,997 (20.9)       |
|                                          | 60~69                | 3,777 (21.6)            | 2,612 (22.7)                      | 3,094 (24.9)       | 1,386 (26.9)              | 1,332 (29.8)              | 4,321 (30.1)       |
|                                          | 70~                  | 8,093 (46.2)            | 5,722 (49.8)                      | 4,517 (36.3)       | 1,904 (37.0)              | 1,661 (37.2)              | 5,534 (38.6)       |
| <b>Sex, N (%)</b>                        | Male                 | 11,136 (63.6)           | 6,600 (57.4)                      | 7,069 (56.8)       | 2,886 (56.0)              | 2,477 (55.5)              | 8,278 (57.7)       |
|                                          | Female               | 6,366 (36.4)            | 4,893 (42.6)                      | 5,378 (43.2)       | 2,266 (44.0)              | 1,988 (44.5)              | 6,067 (42.3)       |
| <b>Hypertension, N (%)</b>               | Yes                  | 15,698 (89.7)           | 11,342 (97.4)                     | 12,430 (97.9)      | 5,010 (98.1)              | 4,360 (97.9)              | 13,790 (98.5)      |
|                                          | No                   | 1,804 (10.3)            | 299 (2.6)                         | 268 (2.1)          | 96 (1.9)                  | 92 (2.1)                  | 215 (1.5)          |
| <b>Diabetes Mellitus, N (%)</b>          | Yes                  | 10,732 (61.3)           | 9,353 (81.4)                      | 10,367 (83.3)      | 4,399 (85.4)              | 3,835 (85.9)              | 12,342 (86.0)      |
|                                          | No                   | 6,770 (38.7)            | 2,140 (18.6)                      | 2,080 (16.7)       | 753 (14.6)                | 630 (14.1)                | 2,003 (14.0)       |
| <b>CHD, N (%)</b>                        | Yes                  | 4,895 (28.0)            | 5,090 (43.7)                      | 6,434 (51.7)       | 3,018 (58.6)              | 2,665 (59.7)              | 9,251 (64.5)       |
|                                          | No                   | 12,607 (72.0)           | 6,551 (56.3)                      | 6,013 (48.3)       | 2,134 (41.4)              | 1,800 (40.3)              | 5,094 (35.5)       |
| <b>CCI, Means (SD)</b>                   | total                | 2.68 (1.9)              | 3.52(1.9)                         | 3.44(1.9)          | 3.54 (1.9)                | 3.55 (1.9)                | 3.62 (1.9)         |
| <b>Groups by CCI,<br/>N (%)</b>          | CCI < 3              | 9,082 (51.9)            | 3,808 (33.1)                      | 4,336 (34.8)       | 1,711 (33.2)              | 1,429 (32.0)              | 4,473 (31.2)       |
|                                          | CCI ≥ 3              | 8,420 (48.1)            | 7,685 (66.9)                      | 81,11 (65.2)       | 3,441 (66.8)              | 3,036 (68.0)              | 9,872 (68.8)       |

\*PDC was calculated by dividing the number of statin prescription days after entry by the total follow-up period from the initiation of hemodialysis to the end of data collection or mortality event.

ESRD, end-stage renal disease; SD, standard deviation; CHD, coronary heart disease; CCI, Charlson Comorbidity Index.

Note that all variables showed statistically significant differences at a p-value of 1%.

**Table S9. All-cause mortality in relation to statin use or non-use after entry, based on various parameters in patients undergoing maintenance hemodialysis.**

| Parameters                   | Statin users after entry |              | Non-users after entry |              | Adjusted HRs* |           |          | Adjusted HRs† |           |          |
|------------------------------|--------------------------|--------------|-----------------------|--------------|---------------|-----------|----------|---------------|-----------|----------|
|                              | All-Cause mortality      | Person-Years | All-Cause mortality   | Person-Years | HRs           | 95% CIs   | P values | HR            | 95% CIs   | P values |
| <b>Whole subjects</b>        | 17,204/36,409 (47.3%)    | 145,034.9    | 19,054/28,995 (65.7%) | 77,194.7     | 0.54          | 0.53-0.55 | <.001    | 0.52          | 0.51-0.53 | <.001    |
| <b>Age category</b>          |                          |              |                       |              |               |           |          |               |           |          |
| >75 years                    | 4,674/6,585 (71.0%)      | 16,859.1     | 7,026/8,243 (85.2%)   | 12,150.0     | 0.56          | 0.54-0.58 | <.001    | 0.55          | 0.53-0.58 | <.001    |
| 40 ~ 75 years                | 12,296/28,589 (43.0%)    | 121,648.5    | 11,688/19,561 (59.8%) | 59,324.0     | 0.53          | 0.52-0.54 | <.001    | 0.51          | 0.50-0.52 | <.001    |
| < 40 years                   | 234/1,235 (18.9%)        | 6,527.4      | 340/1,191 (28.5%)     | 5,720.7      | 0.61          | 0.51-0.72 | <.001    | 0.59          | 0.50-0.70 | <.001    |
| <b>Sex</b>                   |                          |              |                       |              |               |           |          |               |           |          |
| Men                          | 9,977/20,710 (48.2%)     | 81,364.9     | 11,532/17,736 (65.0%) | 48,015.1     | 0.55          | 0.53-0.56 | <.001    | 0.53          | 0.52-0.55 | <.001    |
| Women                        | 7,227/15,699 (46.0%)     | 63,670.0     | 7,522/11,259 (66.8%)  | 29,179.6     | 0.52          | 0.50-0.54 | <.001    | 0.51          | 0.49-0.52 | <.001    |
| <b>Hypertension</b>          |                          |              |                       |              |               |           |          |               |           |          |
| Yes                          | 16,786/35,733 (47.0%)    | 143,122.5    | 17,318/26,897 (64.4%) | 3,165.1      | 0.56          | 0.55-0.57 | <.001    | 0.54          | 0.53-0.55 | <.001    |
| No                           | 418/676 (61.8%)          | 1,912.5      | 1,736/2,098 (82.7%)   | 74,029.6     | 0.48          | 0.43-0.54 | <.001    | 0.47          | 0.42-0.53 | <.001    |
| <b>Diabetes</b>              |                          |              |                       |              |               |           |          |               |           |          |
| Yes                          | 14,726/30,943 (47.6%)    | 123,498.7    | 13,127/20,085 (65.4%) | 55,095.6     | 0.56          | 0.54-0.57 | <.001    | 0.54          | 0.53-0.55 | <.001    |
| No                           | 2,478/5,466 (45.3%)      | 21,536.2     | 5,927/8,910 (66.5%)   | 22,099.1     | 0.49          | 0.47-0.51 | <.001    | 0.49          | 0.46-0.51 | <.001    |
| <b>CHD</b>                   |                          |              |                       |              |               |           |          |               |           |          |
| Yes                          | 10,617/21,368 (49.7%)    | 85,388.9     | 6,641/9,904 (67.1%)   | 26,881.5     | 0.57          | 0.55-0.58 | <.001    | 0.55          | 0.53-0.56 | <.001    |
| No                           | 6,587/15,041 (43.8%)     | 59,646.1     | 12,413/19,091 (65.0%) | 50,313.2     | 0.53          | 0.51-0.54 | <.001    | 0.52          | 0.50-0.53 | <.001    |
| <b>Ezetimibe combination</b> |                          |              |                       |              |               |           |          |               |           |          |
| Yes                          | 2,281/6,169 (37.0%)      | 25,144.52    | 610/974 (62.6%)       | 2,179.4      | 0.36          | 0.33-0.39 | <.001    | 0.35          | 0.32-0.39 | <.001    |
| No                           | 14,923/30,240 (49.3%)    | 119,890.4    | 18,444/28,021 (65.8%) | 75,015.3     | 0.56          | 0.55-0.57 | <.001    | 0.54          | 0.53-0.56 | <.001    |
| <b>CCI</b>                   |                          |              |                       |              |               |           |          |               |           |          |
| <3                           | 4,767/11,949 (40.0%)     | 50,442.8     | 7,741/12,890 (60.1%)  | 37,081.0     | 0.51          | 0.49-0.53 | <.001    | **            |           |          |
| ≥3                           | 12,437/24,460 (50.8%)    | 94,592.1     | 11,313/16,105 (70.2%) | 40,113.7     | 0.53          | 0.51-0.54 | <.001    | **            |           |          |

\*Adjusted for age and sex; †adjusted for age, sex, and CCI.

HR, hazard ratio; CI, confidence interval; CHD, coronary heart disease; CCI, Charlson Comorbidity Index.

**Table S10. Characteristics of study patients before and after propensity score matching.**

| Parameters                                                | Before Matching            |         |                         |         | P Values | After Matching             |         |                         |         |          |
|-----------------------------------------------------------|----------------------------|---------|-------------------------|---------|----------|----------------------------|---------|-------------------------|---------|----------|
|                                                           | Statin users<br>(n=47,902) |         | Non-users<br>(n=17,502) |         |          | Statin users<br>(n=27,763) |         | Non users<br>(n=16,417) |         | P Values |
| <b>Sex, N (%)</b>                                         |                            |         |                         |         | <.001    |                            |         |                         |         | <.001    |
| <b>Male</b>                                               | 27,310                     | (57.0%) | 11,136                  | (63.6%) |          | 15,338                     | (55.3%) | 10,491                  | (63.9%) |          |
| <b>Female</b>                                             | 20,592                     | (43.0%) | 6,366                   | (36.4%) |          | 12,425                     | (44.8%) | 5,926                   | (36.1%) |          |
| <b>Subgroups by age, N (%)</b>                            | 59.4 ± 12.4                |         | 61.1 ± 14.0             |         | <.001    | 59.5 ± 12.9                |         | 61.1 ± 13.9             |         | <.001    |
| <b>30~39</b>                                              | 628                        | (1.3%)  | 294                     | (1.7%)  | <.001    | 442                        | (1.6%)  | 266                     | (1.6%)  | <.001    |
| <b>40~49</b>                                              | 2,764                      | (5.5%)  | 1,214                   | (6.9%)  |          | 1,805                      | (6.5%)  | 1,114                   | (6.8%)  |          |
| <b>50~59</b>                                              | 7,294                      | (15.3%) | 2,414                   | (13.8%) |          | 4,232                      | (15.2%) | 2,247                   | (13.7%) |          |
| <b>60~69</b>                                              | 11,254                     | (23.5%) | 3,255                   | (18.6%) |          | 6,129                      | (22.1%) | 3,083                   | (18.8%) |          |
| <b>70~79</b>                                              | 15,128                     | (31.6%) | 4,708                   | (26.9%) |          | 8,360                      | (30.1%) | 4,497                   | (27.4%) |          |
| <b>80~</b>                                                | 10,834                     | (22.6%) | 5,617                   | (32.1%) |          | 6,795                      | (24.5%) | 5,210                   | (31.7%) |          |
| <b>Medical Aids Beneficiaries</b>                         | 4,868                      | (10.2%) | 1,983                   | (11.3%) | <.001    | 3,023                      | (10.9%) | 1,812                   | (11.1%) | 0.628    |
| <b>Constantly prescribed at the same medical facility</b> | 40,559                     | (84.7%) | 14,468                  | (82.7%) | 0.067    | 23,239                     | (83.7%) | 13,716                  | (83.6%) | 0.897    |
| <b>Healthcare facility</b>                                |                            |         |                         |         |          |                            |         |                         |         |          |
| <b>Tertiary and educational</b>                           | 6,337                      | (13.3%) | 2,488                   | (14.7%) | <.001    | 3,819                      | (13.7%) | 2,323                   | (14.2%) | 0.039    |
| <b>Tertiary hospital</b>                                  | 17,176                     | (35.9%) | 6,553                   | (14.2%) |          | 10,255                     | (36.9%) | 6,149                   | (37.5%) |          |
| <b>General hospital</b>                                   | 3,347                      | (7.0%)  | 1,280                   | (37.4%) |          | 2,067                      | (7.5%)  | 1,202                   | (7.3%)  |          |
| <b>Clinics</b>                                            | 15,976                     | (33.4%) | 4,616                   | (7.3%)  |          | 8,076                      | (29.1%) | 4,540                   | (27.7%) |          |
| <b>Others</b>                                             | 5,066                      | (10.6%) | 2,565                   | (26.4%) |          | 3,546                      | (12.8%) | 2,203                   | (13.4%) |          |
| <b>CCI</b>                                                | 3.5 ± 1.9                  |         | 2.7 ± 1.9               |         | <.001    | 3.0 ± 1.8                  |         | 2.8 ± 1.9               |         | <.001    |
| <b>Specific medical care within one year before entry</b> |                            |         |                         |         |          |                            |         |                         |         |          |
| <b>Emergency room visit</b>                               | 0.5 ± 1.2                  |         | 0.4 ± 1.3               |         | 0.010    | 0.4 ± 1.2                  |         | 0.4 ± 1.2               |         | 0.256    |
| <b>Hospitalization</b>                                    | 3.2 ± 3.4                  |         | 3.2 ± 3.5               |         | 0.974    | 3.2 ± 3.5                  |         | 3.2 ± 3.4               |         | 0.608    |

CCI, Charlson Comorbidity Index.

**Table S11. Association between statin use and all-cause mortality in patients undergoing maintenance hemodialysis after propensity score matching.**

| Parameters related with statin use                                     | All-Cause mortality | All patients | Person-Years | Adjusted model-1* |           |          | Adjusted model-2† |           |          | Adjusted model-3‡ |           |          |
|------------------------------------------------------------------------|---------------------|--------------|--------------|-------------------|-----------|----------|-------------------|-----------|----------|-------------------|-----------|----------|
|                                                                        |                     |              |              | HRs               | 95% CIs   | P values | HRs               | 95% CIs   | P values | HRs               | 95% CIs   | P values |
| <b>Non-users</b>                                                       | 10,587              | 16,417       | 48,228.2     | Ref               | -         | -        | Ref               | -         | -        | Ref               | -         | -        |
| <b>Statin ever-use</b>                                                 |                     |              |              |                   |           |          |                   |           |          |                   |           |          |
| Ever-users                                                             | 14,181              | 27,763       | 97,657.8     | 0.71              | 0.69-0.73 | <.001    | 0.70              | 0.68-0.72 | <.001    | 0.73              | 0.71-0.75 | <.001    |
| Over 3 months                                                          | 12,146              | 24,766       | 88,998.1     | 0.67              | 0.65-0.69 | <.001    | 0.66              | 0.64-0.68 | <.001    | 0.68              | 0.66-0.70 | <.001    |
| <b>Statin use status during the study period</b>                       |                     |              |              |                   |           |          |                   |           |          |                   |           |          |
| Pre-ESRD only users                                                    | 5,127               | 7,576        | 16,570.2     | 1.27              | 1.23-1.32 | <.001    | 1.26              | 1.22-1.30 | <.001    | 1.274             | 1.23-1.32 | <.001    |
| Continuous users                                                       | 6,958               | 15,336       | 5,7426.2     | 0.59              | 0.58-0.61 | <.001    | 0.58              | 0.56-0.60 | <.001    | 0.60              | 0.58-0.62 | <.001    |
| Post-ESRD only users                                                   | 2,096               | 4,851        | 23,661.4     | 0.48              | 0.46-0.50 | <.001    | 0.49              | 0.47-1.52 | <.001    | 0.50              | 0.48-0.53 | <.001    |
| <b>Statin use period after entry: Proportion of days covered (PDC)</b> |                     |              |              |                   |           |          |                   |           |          |                   |           |          |
| PDC < 25%                                                              | 3,479               | 7,253        | 3,859.2      | 0.59              | 0.56-0.61 | <.001    | 0.58              | 0.56-0.61 | <.001    | 0.59              | 0.57-0.62 | <.001    |
| 25 ≤ PDC < 50%                                                         | 1,389               | 2,868        | 11,823.7     | 0.61              | 0.58-0.65 | <.001    | 0.60              | 0.57-0.64 | <.001    | 0.62              | 0.59-0.66 | <.001    |
| 50 ≤ PDC < 75%                                                         | 1,162               | 2,456        | 9,820.4      | 0.59              | 0.55-0.62 | <.001    | 0.58              | 0.55-0.62 | <.001    | 0.60              | 0.57-0.64 | <.001    |
| PDC ≥75%                                                               | 3,024               | 7,610        | 28,184.5     | 0.51              | 0.49-0.53 | <.001    | 0.50              | 0.48-0.53 | <.001    | 0.52              | 0.50-0.54 | <.001    |

**The intensity of statin therapy after entry**

|                       |       |        |          |      |           |       |      |           |       |      |           |       |
|-----------------------|-------|--------|----------|------|-----------|-------|------|-----------|-------|------|-----------|-------|
| Variable-intensity    | 3,102 | 7,082  | 28,830.2 | 0.55 | 0.52-0.57 | <.001 | 0.53 | 0.51-0.56 | <.001 | 0.56 | 0.54-0.59 | <.001 |
| High-intensity        | 155   | 262    | 947.6    | 0.78 | 0.67-0.91 | 0.002 | 0.80 | 0.69-0.94 | 0.007 | 0.81 | 0.69-0.95 | 0.008 |
| Moderate-intensity    | 5,637 | 12,522 | 50,086.8 | 0.56 | 0.55-0.58 | <.001 | 0.56 | 0.54-0.58 | <.001 | 0.57 | 0.55-0.59 | <.001 |
| Low-or-less-intensity | 160   | 321    | 1,223.1  | 0.69 | 0.59-0.80 | <.001 | 0.70 | 0.60-0.82 | <.001 | 0.76 | 0.65-0.89 | <.001 |

---

\*Adjusted for age and sex; †adjusted for age, sex, and CCI; ‡adjusted for age, sex, CCI, and ezetimibe.

HR, hazard ratio; CI, confidence interval; ESRD, end-stage renal disease; CCI, Charlson Comorbidity Index.

**Table S12. All-cause mortality according to various parameters in patients undergoing maintenance hemodialysis in relation to statin use or non-use after entry after propensity score matching.**

| Parameters                   | Statin users after entry |              | Non-users after entry |              | Adjusted HRs* |           |          | Adjusted HRs† |           |          |
|------------------------------|--------------------------|--------------|-----------------------|--------------|---------------|-----------|----------|---------------|-----------|----------|
|                              | All-Cause mortality      | Person-Years | All-Cause mortality   | Person-Years | HRs           | 95% CIs   | P values | HR            | 95% CIs   | P values |
| <b>Whole subjects</b>        | 9,054/20,187 (44.9%)     | 64,798.4     | 15,714/23,993 (65.5%) | 81,087.6     | 0.53          | 0.52-0.54 | <.001    | 0.52          | 0.51-0.54 | <.001    |
| <b>Age category</b>          |                          |              |                       |              |               |           |          |               |           |          |
| >75 years                    | 1,188/1,435 (82.8%)      | 4,478        | 3,110/3,360 (92.6%)   | 3,654.1      | 0.57          | 0.53-0.61 | <.001    | 0.57          | 0.53-0.60 | <.001    |
| 40 ~ 75 years                | 7,566/17,039 (44.4%)     | 52,065.6     | 12,074/18,719 (64.5%) | 69,335.4     | 0.52          | 0.51-0.54 | <.001    | 0.52          | 0.51-0.54 | <.001    |
| < 40 years                   | 300/1,713 (17.5%)        | 8,254.8      | 530/1,914 (27.7%)     | 8,098.1      | 0.58          | 0.50-0.67 | <.001    | 0.57          | 0.50-0.66 | <.001    |
| <b>Sex</b>                   |                          |              |                       |              |               |           |          |               |           |          |
| Men                          | 5,095/11,115 (45.8%)     | 40,197.4     | 9,568/14,714 (65.0%)  | 44,002.2     | 0.54          | 0.52-0.56 | <.001    | 0.53          | 0.52-0.55 | <.001    |
| Women                        | 3,959/9,072 (43.9%)      | 24,600.9     | 6,146/9,279 (66.2%)   | 37,085.4     | 0.51          | 0.49-0.53 | <.001    | 0.51          | 0.49-0.53 | <.001    |
| <b>Hypertension</b>          |                          |              |                       |              |               |           |          |               |           |          |
| Yes                          | 8,759/19,700 (44.5%)     | 2,559.5      | 14,328/22,318 (64.2%) | 1,373.2      | 0.54          | 0.53-0.56 | <.001    | 0.54          | 0.52-0.55 | <.001    |
| No                           | 295/487 (60.6%)          | 62,238.9     | 1,386/1,675 (82.7%)   | 79,714.4     | 0.50          | 0.44-0.57 | <.001    | 0.50          | 0.44-0.56 | <.001    |
| <b>Diabetes</b>              |                          |              |                       |              |               |           |          |               |           |          |
| Yes                          | 6,744/15,016 (44.9%)     | 19,911.2     | 10,664/16,237 (65.7%) | 20,437.9     | 0.53          | 0.52-0.55 | <.001    | 0.53          | 0.51-0.54 | <.001    |
| No                           | 2,310/5,171 (44.7%)      | 44,887.2     | 5,050/7,756 (65.1%)   | 60,649.7     | 0.51          | 0.48-0.53 | <.001    | 0.51          | 0.48-0.53 | <.001    |
| <b>CHD</b>                   |                          |              |                       |              |               |           |          |               |           |          |
| Yes                          | 5,246/10,977 (47.8%)     | 42,864.4     | 5,264/7,899 (66.6%)   | 36,746.5     | 0.56          | 0.54-0.58 | <.001    | 0.55          | 0.53-0.58 | <.001    |
| No                           | 3,808/9,210 (41.3%)      | 21,934.0     | 10,450/16,094 (64.9%) | 44,341.1     | 0.51          | 0.49-0.53 | <.001    | 0.51          | 0.49-0.53 | <.001    |
| <b>Ezetimibe combination</b> |                          |              |                       |              |               |           |          |               |           |          |
| Yes                          | 1,139/3,261 (34.9%)      | 63,525.9     | 385/603 (63.8%)       | 67,726.5     | 0.32          | 0.28-0.36 | <.001    | 0.32          | 0.28-0.36 | <.001    |
| No                           | 7,915/16,926 (46.8%)     | 12,72.4      | 15,329/23,390 (65.5%) | 13,361.1     | 0.55          | 0.53-0.56 | <.001    | 0.54          | 0.53-0.56 | <.001    |
| <b>CCI</b>                   |                          |              |                       |              |               |           |          |               |           |          |
| <3                           | 3,542/9,138 (38.8%)      | 33,304.9     | 6,688/11,289 (59.2%)  | 38,758.5     | 0.52          | 0.50-0.54 | <.001    |               |           |          |
| ≥3                           | 5,512/11,049 (49.9%)     | 31,493.4     | 9,026/12,704 (71.0%)  | 42,329.1     | 0.52          | 0.50-0.54 | <.001    |               |           |          |

\*Adjusted for age and sex; †adjusted for age, sex, and CCI.

HR, hazard ratio; CI, confidence interval; CHD, coronary heart disease; CCI, Charlson Comorbidity Index.

**Table S13. All-cause mortality with lipophilic statins versus hydrophilic statins, based on various parameters in patients undergoing maintenance hemodialysis.**

| Parameters                   | Hydrophilic statin users<br>(Reference) |              | Lipophilic statin users |              | Adjusted HRs* |           |          | Adjusted HRs† |           |          |
|------------------------------|-----------------------------------------|--------------|-------------------------|--------------|---------------|-----------|----------|---------------|-----------|----------|
|                              | All-Cause mortality                     | Person-Years | All-Cause mortality     | Person-Years | HRs           | 95% CIs   | P Values | HRs           | 95% CIs   | P values |
| <b>Total</b>                 | 1,644/2,832 (58.1%)                     | 9,452.8      | 13,141/23,680 (55.4%)   | 80,405.3     | 0.93          | 0.88-0.97 | 0.004    | 0.92          | 0.88-0.97 | 0.002    |
| <b>Age Groups</b>            |                                         |              |                         |              |               |           |          |               |           |          |
| >75 years                    | 249/271 (91.9%)                         | 442.4        | 1,961/2,230 (87.9%)     | 4,337.8      | 0.84          | 0.74-0.96 | 0.001    | 0.86          | 0.76-0.97 | 0.01     |
| 40 ~ 75 years                | 1,359/2,340 (58.1%)                     | 7,994.8      | 10,818/19,774 (54.7%)   | 68,494.6     | 0.93          | 0.88-0.99 | 0.017    | 0.93          | 0.88-0.98 | 0.01     |
| < 40 years                   | 36/221 (16.3%)                          | 1,015.6      | 362/1,676 (21.6%)       | 7,572.9      | 1.34          | 0.95-1.89 | 0.09     | 1.25          | 0.88-1.77 | 0.20     |
| <b>Sex</b>                   |                                         |              |                         |              |               |           |          |               |           |          |
| Men                          | 1,014/1,749 (58.0%)                     | 5,922.2      | 7,567/13,651 (55.4%)    | 46,336.3     | 0.95          | 0.89-1.01 | 0.11     | 0.94          | 0.88-1.00 | 0.06     |
| Women                        | 630/1,083 (58.2%)                       | 3,530.7      | 5,574/10,029 (55.6%)    | 34,069.0     | 0.87          | 0.80-0.95 | 0.01     | 0.87          | 0.80-0.94 | 0.001    |
| <b>Hypertension</b>          |                                         |              |                         |              |               |           |          |               |           |          |
| Yes                          | 1,559/2,724 (57.2%)                     | 195.3        | 12,711/23,083 (55.0%)   | 1,316.2      | 0.93          | 0.88-0.98 | 0.01     | 0.93          | 0.88-0.98 | 0.004    |
| No                           | 85/108 (78.7%)                          | 9,257.5      | 430/597 (72.1%)         | 79,089.1     | 0.81          | 0.64-1.03 | 0.004    | 0.80          | 0.63-1.02 | 0.07     |
| <b>Diabetes</b>              |                                         |              |                         |              |               |           |          |               |           |          |
| Yes                          | 1,264/2,183 (57.9%)                     | 2,056.2      | 10,732/19,305 (55.6%)   | 14,145.7     | 0.94          | 0.89-1.00 | 0.04     | 0.93          | 0.88-0.99 | 0.02     |
| No                           | 380/649 (58.6%)                         | 7,396.6      | 2,409/4,375 (55.1%)     | 66,259.6     | 0.86          | 0.77-0.96 | 0.006    | 0.87          | 0.78-0.97 | 0.009    |
| <b>CHD</b>                   |                                         |              |                         |              |               |           |          |               |           |          |
| Yes                          | 889/1,453 (61.1%)                       | 4,713.7      | 6,693/11,690 (57.3%)    | 39,828.5     | 0.87          | 0.81-0.93 | <.001    | 0.86          | 0.80-0.93 | <.001    |
| No                           | 755/1,379 (54.7%)                       | 4,739.1      | 6,448/11,990 (53.8%)    | 40,576.8     | 0.98          | 0.91-1.05 | 0.54     | 0.97          | 0.90-1.05 | 0.43     |
| <b>Ezetimibe combination</b> |                                         |              |                         |              |               |           |          |               |           |          |
| Yes                          | 5/37 (13.5%)                            | 169.4        | 1,304/2,854 (45.7%)     | 10,206       | 3.55          | 1.47-8.54 | 0.005    | 3.39          | 1.41-8.15 | 0.007    |
| No                           | 1,639/2,795 (58.6%)                     | 9,283.4      | 11,837/20,826 (56.8%)   | 70,199.2     | 0.93          | 0.88-0.98 | 0.006    | 0.75          | 0.75-0.80 | <.001    |
| <b>CCI</b>                   |                                         |              |                         |              |               |           |          |               |           |          |
| <3                           | 548/1,115 (49.1%)                       | 3,923.4      | 4,148/8,470 (49.0%)     | 30,658.7     | 0.92          | 0.84-1.01 | 0.067    | -             | -         | -        |
| ≥3                           | 1,096/1,717 (63.8%)                     | 5,529.4      | 8,993/15,210 (59.1%)    | 49,746.6     | 0.91          | 0.86-0.97 | 0.004    | -             | -         | -        |

\*Adjusted for age and sex; †adjusted for age, sex, and CCI.

HR, hazard ratio; CI, confidence interval; CHD, coronary heart disease; CCI, Charlson Comorbidity Index.

**Figure S1. Kaplan-Meier curves for crude all-cause mortality related to statin therapy use according to various conditions in adult patients undergoing maintenance hemodialysis.**

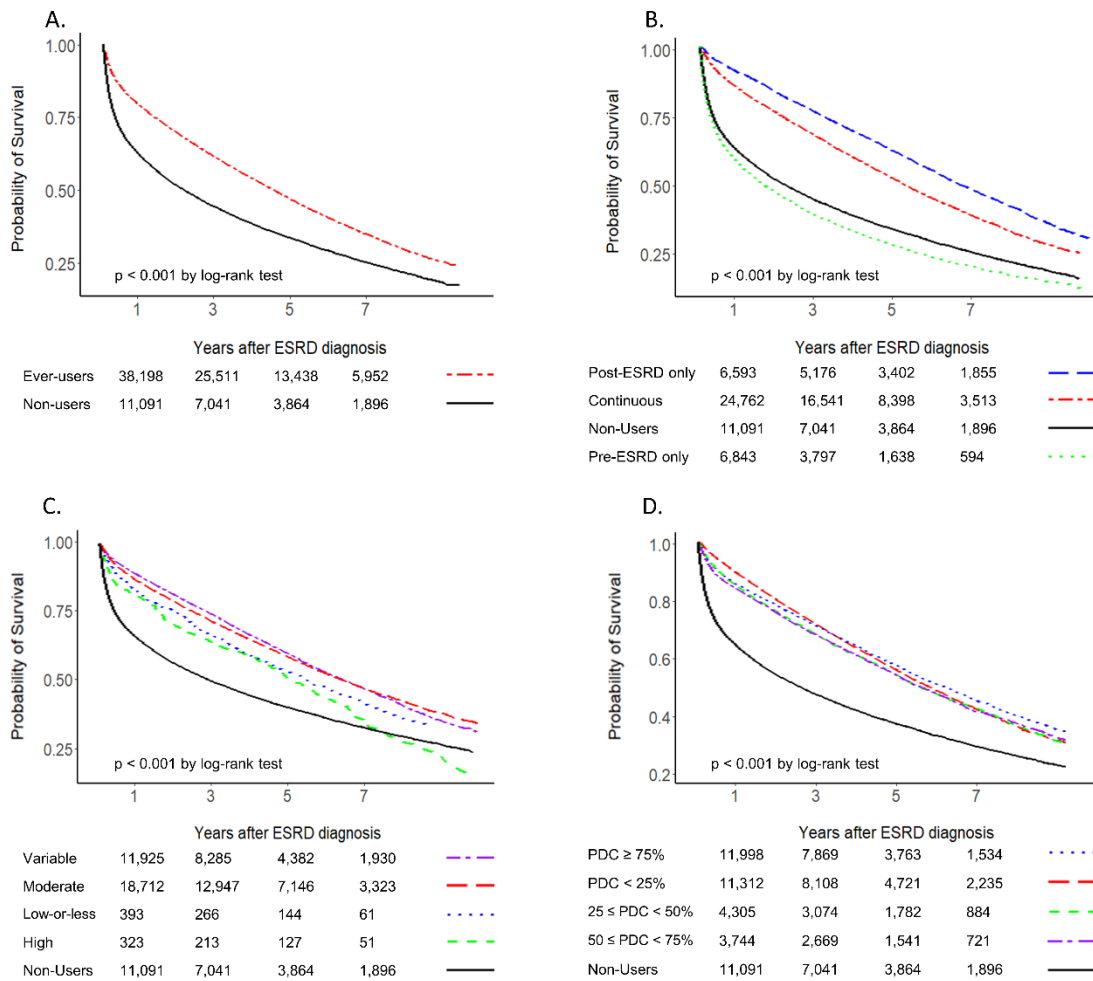

**A, Statin ever-users versus non-users. B, Statin use before and after entry (initiation of hemodialysis). C, The intensity of statin therapy. D, Prescription maintenance of statin therapy, as determined by the proportion of days covered. Note that the plot lines for the two PDC groups (25 to <50% and 50 to <75%) overlap completely. ESRD, end-stage renal disease.**



## Supplemental References:

1. Stone NJ, Robinson JG, Lichtenstein AH, Bairey Merz CN, Blum CB, Eckel RH, Goldberg AC, Gordon D, Levy D, Lloyd-Jones DM, McBride P, Schwartz JS, Shero ST, Smith SC, Jr., Watson K, Wilson PW, Eddleman KM, Jarrett NM, LaBresh K, Nevo L, Wnek J, Anderson JL, Halperin JL, Albert NM, Bozkurt B, Brindis RG, Curtis LH, DeMets D, Hochman JS, Kovacs RJ, Ohman EM, Pressler SJ, Sellke FW, Shen WK, Smith SC, Jr. and Tomaselli GF. 2013 ACC/AHA guideline on the treatment of blood cholesterol to reduce atherosclerotic cardiovascular risk in adults: a report of the American College of Cardiology/American Heart Association Task Force on Practice Guidelines. *Circulation*. 2014;129:S1-45.
2. Charlson ME, Pompei P, Ales KL and MacKenzie CR. A new method of classifying prognostic comorbidity in longitudinal studies: development and validation. *Journal of chronic diseases*. 1987;40:373-83.
